# Supplementary material for: Coherent internal conversion from high lying electronic states to S1 in boron-dipyrromethene derivatives
Source: Royal Society of Chemistry journal article supplement (doi:10.1039/d1cp03513d), 2021-01-01
Supplement: d1cp03513d1.pdf [file d1cp03513d1.pdf]

## Supporting Information

### Coherent internal conversion from high lying electronic states to $S_1$ in boron-dipyrromethene derivatives

*Changmin Lee<sup>†‡</sup>, Kiho Seo<sup>†</sup>, Munnyon Kim, and Taiha Joo<sup>\*</sup>*

Department of Chemistry, Pohang University of Science and Technology (POSTECH),  
Pohang, 37673, South Korea

<sup>†</sup> These authors contributed equally to the work

<sup>‡</sup> Present address: Department of Chemistry, Northwestern University, Evanston, IL 60208,  
USA

<sup>\*</sup> Corresponding author, E-mail: thjoo@postech.ac.kr

### Contents

Figure S1. Instrumental response function of the TF apparatus with excitation at 550 nm.

Figure S2. Area normalized time-resolved fluorescence spectra of PM597 and PM650.

Figure S3. First moment of TF spectra of PM597 vs. time.

Figure S4. First moment of TF spectra of PM650 vs. time.

Figure S5. Area of TF spectra of PM597 vs. time.

Figure S6. Area of TF spectra of PM650 vs. time.

Figure S7. Raman spectrum of PM597 in benzene.

Table S1. Vertical transition wavelengths of PM597 and PM650 calculated by TDDFT method.

Table S2. Calculated Huang-Rhys factors between the ground and  $S_1$  states for PM597 and

PM650.

Table S3. Phases of the oscillations in the time-resolved fluorescence signals.

Table S4. Calculated geometry of the  $S_0$  state of PM597.

Table S5. Calculated geometry of the  $S_1$  state of PM597.

Table S6. Calculated geometry of the  $S_0$  state of PM650.

Table S7. Calculated geometry of the  $S_1$  state of PM650.

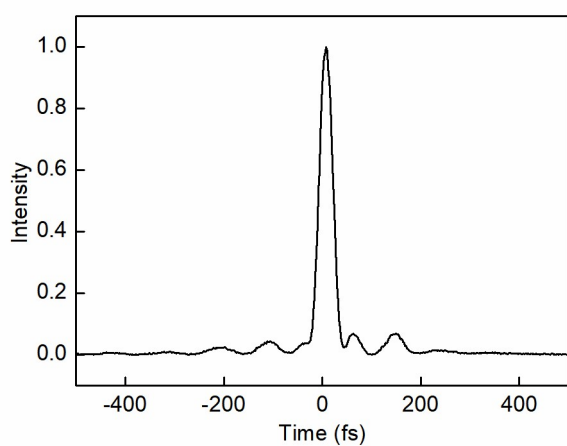

**Figure S1.** Instrumental response function of the TF apparatus with excitation at 550 nm.

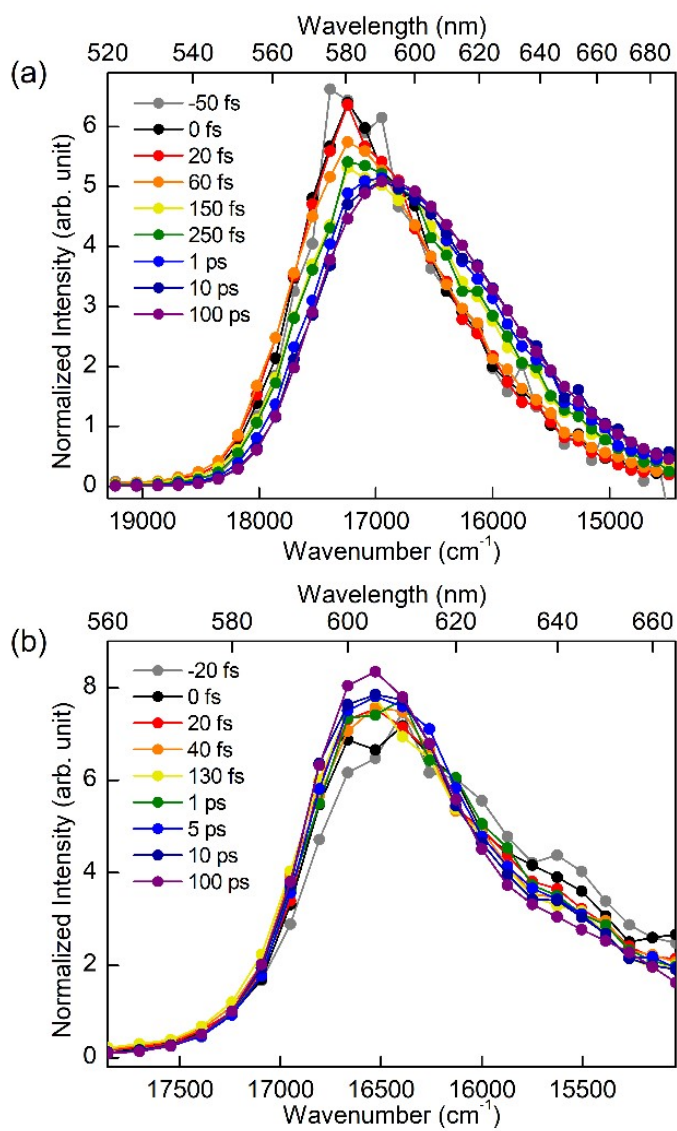

**Figure S2.** Area normalized time-resolved fluorescence spectra of (a) PM597 and (b) PM650.

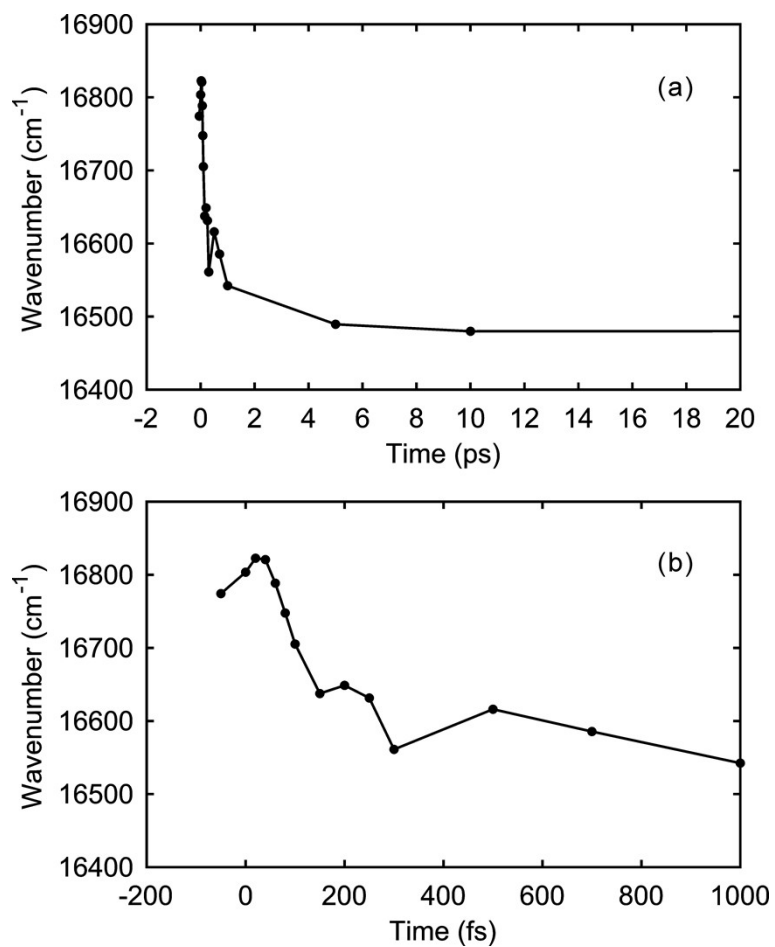

**Figure S3.** First moment of time-resolved fluorescence spectra of PM597 vs. time. (a) From -2 to 20 ps; (b) from -200 to 1000 fs. Note that the modulation of the first moment is not a noise but oscillations due to the nuclear wave packet motions (see I. Eom and T. Joo, *J. Chem. Phys.* **2009**, *113*, 244507)

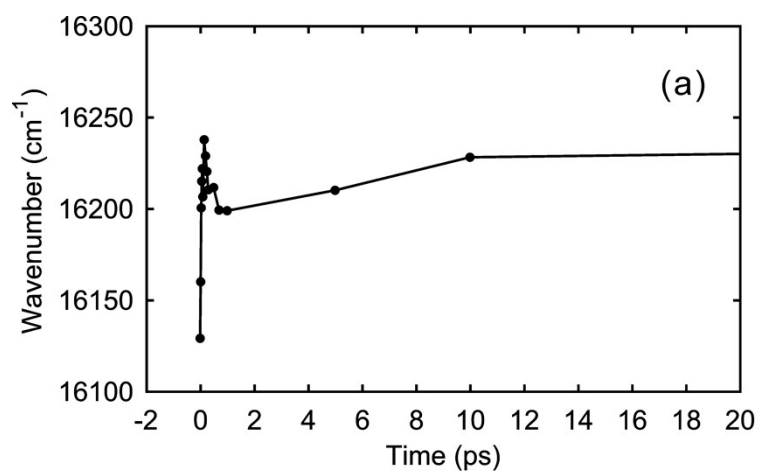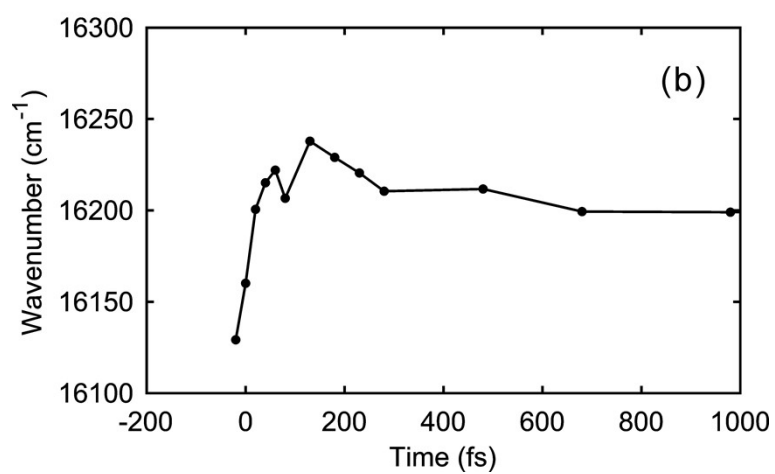

**Figure S4.** First moment of time-resolved fluorescence spectra of PM650 vs. time. (a) From -2 to 20 ps; (b) from -200 to 1000 fs.

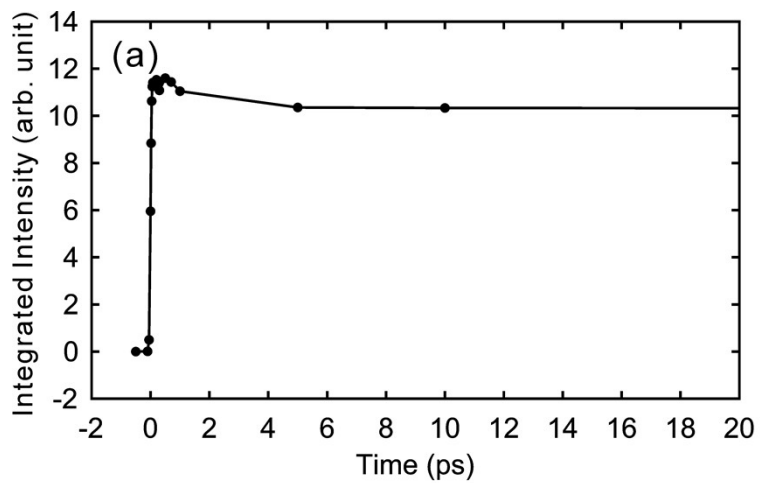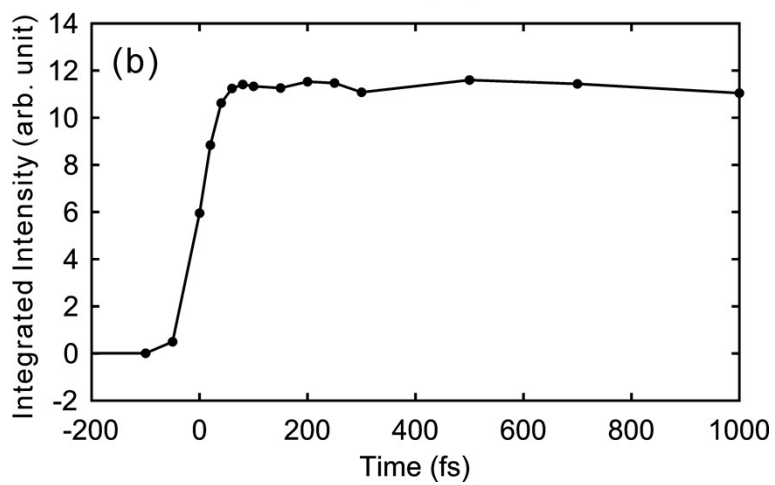

**Figure S5.** Area of time-resolved fluorescence spectra of PM597 in two different time ranges.

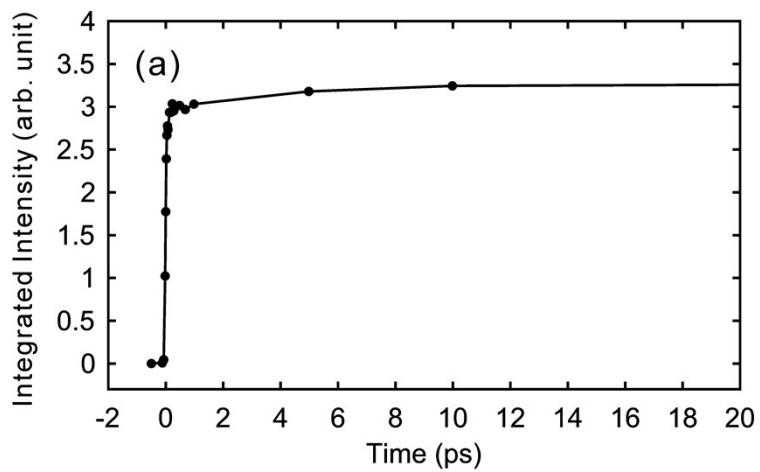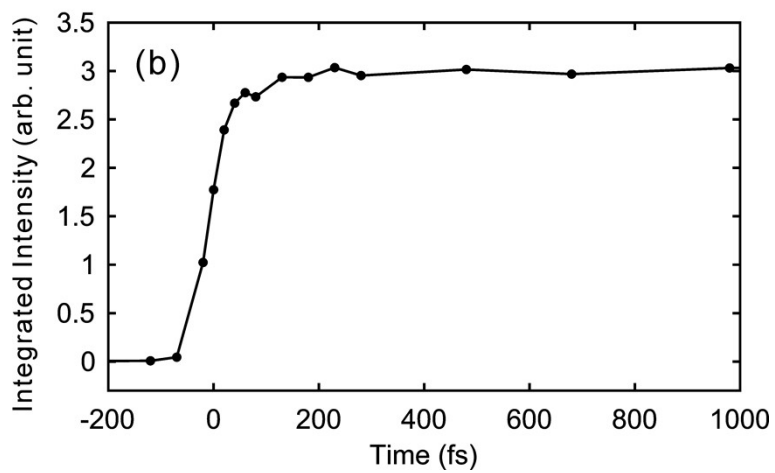

**Figure S6.** Area of time-resolved fluorescence spectra of PM650 in two different time ranges.

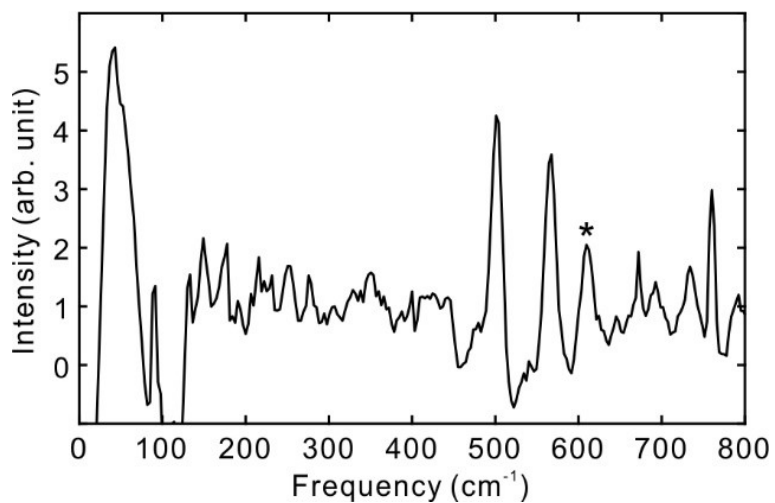

**Figure S7.** Raman spectrum of PM597 in benzene measured by 632.8 nm excitation. Because of the strong fluorescence of PM597, only the two peaks at 503 and 567 cm<sup>-1</sup> are observed. \* represents the Raman peak of benzene at 609 cm<sup>-1</sup>. Raman spectrum of PM650 could not be obtained because of the much stronger fluorescence.



**Table S1.** Vertical transition wavelengths of PM597 and PM650 calculated by TDDFT method using CAM-B3LYP/6-31+G(d,p).

|                | PM597                         |                             | PM650           |               |
|----------------|-------------------------------|-----------------------------|-----------------|---------------|
|                | Wavelength (nm) <sup>a)</sup> | Osc. Strength <sup>a)</sup> | Wavelength (nm) | Osc. strength |
| S <sub>1</sub> | 473 (486)                     | 0.596 (0.453)               | 496             | 0.466         |
| S <sub>2</sub> | 341 (393)                     | 0.077 (0.191)               | 386             | 0.125         |
| S <sub>3</sub> | 319 (378)                     | 0.046 (0.036)               | 362             | 0.040         |

<sup>a)</sup> Numbers in parentheses were calculated by B3LYP/6-31+G(d,p).

**Table S2.** Vibrational reorganization energies ( $\lambda_i$ ) and Huang-Rhys factors (HRF) for transition from the ground to  $S_1$  states of PM597 and PM650 calculated by TDDFT method using CAM-B3LYP/6-31+G(d,p). Total vibrational reorganization energies ( $\Sigma\lambda_i$ ) are 616 and 512  $\text{cm}^{-1}$  for PM597 and PM650, respectively.

| PM597                     |                                  |         | PM650                     |                                  |         |
|---------------------------|----------------------------------|---------|---------------------------|----------------------------------|---------|
| Freq ( $\text{cm}^{-1}$ ) | $\lambda_i$ ( $\text{cm}^{-1}$ ) | HRF     | Freq ( $\text{cm}^{-1}$ ) | $\lambda_i$ ( $\text{cm}^{-1}$ ) | HRF     |
| 24                        | 32.3                             | 1.34583 | 23                        | 0.0                              | 0.00000 |
| 30                        | 0                                | 0.00000 | 49                        | 0.0                              | 0.00000 |
| 38                        | 3.6                              | 0.09474 | 54                        | 0.0                              | 0.00000 |
| 54                        | 0                                | 0.00000 | 73                        | 0.0                              | 0.00000 |
| 66                        | 10                               | 0.15152 | 74                        | 0.0                              | 0.00000 |
| 69                        | 0                                | 0.00000 | 75                        | 0.0                              | 0.00000 |
| 83                        | 8.6                              | 0.10361 | 95                        | 0.0                              | 0.00000 |
| 126                       | 13                               | 0.10317 | 108                       | 0.0                              | 0.00000 |
| 135                       | 1.4                              | 0.01037 | 118                       | 0.0                              | 0.00000 |
| 143                       | 0                                | 0.00000 | 144                       | 0.0                              | 0.00000 |
| 158                       | 58.9                             | 0.37278 | 150                       | 0.0                              | 0.00000 |
| 170                       | 0                                | 0.00000 | 152                       | 0.0                              | 0.00000 |
| 182                       | 0                                | 0.00000 | 153                       | 21.3                             | 0.13901 |
| 188                       | 7.3                              | 0.03883 | 153                       | 0.2                              | 0.00137 |
| 197                       | 0                                | 0.00000 | 171                       | 0.0                              | 0.00000 |
| 204                       | 0.7                              | 0.00343 | 226                       | 0.0                              | 0.00000 |
| 220                       | 0                                | 0.00000 | 244                       | 0.0                              | 0.00000 |
| 222                       | 6.6                              | 0.02973 | 247                       | 31.7                             | 0.12848 |
| 232                       | 1.8                              | 0.00776 | 257                       | 0.0                              | 0.00000 |
| 237                       | 0                                | 0.00000 | 270                       | 0.0                              | 0.00000 |
| 241                       | 0                                | 0.00000 | 284                       | 0.0                              | 0.00000 |
| 250                       | 6.3                              | 0.02520 | 292                       | 20.0                             | 0.06869 |
| 261                       | 0                                | 0.00000 | 306                       | 2.9                              | 0.00932 |
| 274                       | 2.4                              | 0.00876 | 313                       | 0.0                              | 0.00000 |
| 279                       | 0                                | 0.00000 | 322                       | 0.0                              | 0.00000 |
| 286                       | 1.8                              | 0.00629 | 348                       | 0.0                              | 0.00000 |
| 299                       | 6.8                              | 0.02274 | 371                       | 11.6                             | 0.03131 |
| 299                       | 0                                | 0.00000 | 389                       | 0.0                              | 0.00000 |
| 317                       | 0                                | 0.00000 | 406                       | 0.0                              | 0.00000 |
| 320                       | 33                               | 0.10313 | 425                       | 39.1                             | 0.09180 |
| 321                       | 0                                | 0.00000 | 472                       | 0.0                              | 0.00000 |
| 330                       | 0.2                              | 0.00061 | 485                       | 0.0                              | 0.00000 |
| 337                       | 0                                | 0.00000 | 539                       | 0.0                              | 0.00000 |
| 346                       | 0                                | 0.00000 | 546                       | 0.0                              | 0.00001 |
| 356                       | 0                                | 0.00000 | 546                       | 5.6                              | 0.01027 |

|      |      |         |      |       |         |
|------|------|---------|------|-------|---------|
| 365  | 3.5  | 0.00959 | 554  | 33.3  | 0.06010 |
| 369  | 0    | 0.00000 | 555  | 0.0   | 0.00000 |
| 388  | 3.1  | 0.00799 | 649  | 1.1   | 0.00175 |
| 392  | 0    | 0.00000 | 674  | 0.0   | 0.00000 |
| 400  | 3.7  | 0.00925 | 676  | 0.0   | 0.00000 |
| 404  | 0    | 0.00000 | 694  | 0.0   | 0.00000 |
| 425  | 3    | 0.00706 | 699  | 0.0   | 0.00000 |
| 440  | 0    | 0.00000 | 721  | 0.0   | 0.00000 |
| 447  | 0.6  | 0.00134 | 789  | 0.6   | 0.00072 |
| 456  | 9    | 0.01974 | 794  | 0.0   | 0.00000 |
| 491  | 0    | 0.00000 | 831  | 1.3   | 0.00158 |
| 504  | 60   | 0.11905 | 868  | 0.0   | 0.00000 |
| 534  | 2    | 0.00375 | 953  | 0.0   | 0.00000 |
| 559  | 0.3  | 0.00054 | 955  | 4.2   | 0.00435 |
| 562  | 0    | 0.00000 | 992  | 0.0   | 0.00000 |
| 565  | 58.2 | 0.10301 | 1045 | 0.0   | 0.00000 |
| 593  | 0    | 0.00000 | 1048 | 0.0   | 0.00000 |
| 625  | 0    | 0.00000 | 1049 | 0.5   | 0.00047 |
| 680  | 0.1  | 0.00015 | 1054 | 3.5   | 0.00328 |
| 698  | 0    | 0.00000 | 1063 | 0.0   | 0.00000 |
| 702  | 4.7  | 0.00670 | 1066 | 0.0   | 0.00000 |
| 727  | 0.4  | 0.00055 | 1079 | 0.0   | 0.00000 |
| 730  | 0    | 0.00000 | 1080 | 0.0   | 0.00000 |
| 737  | 0.1  | 0.00014 | 1091 | 0.0   | 0.00000 |
| 763  | 0    | 0.00000 | 1098 | 0.0   | 0.00000 |
| 834  | 0    | 0.00000 | 1123 | 4.1   | 0.00363 |
| 853  | 0    | 0.00000 | 1128 | 0.0   | 0.00000 |
| 865  | 4.8  | 0.00555 | 1129 | 14.2  | 0.01262 |
| 896  | 0    | 0.00000 | 1155 | 0.0   | 0.00000 |
| 929  | 0    | 0.00000 | 1186 | 0.2   | 0.00020 |
| 950  | 0    | 0.00000 | 1262 | 0.0   | 0.00000 |
| 950  | 0    | 0.00000 | 1273 | 115.5 | 0.09077 |
| 959  | 0    | 0.00000 | 1330 | 0.0   | 0.00000 |
| 960  | 0    | 0.00000 | 1356 | 0.0   | 0.00000 |
| 977  | 0    | 0.00000 | 1380 | 9.6   | 0.00698 |
| 977  | 0    | 0.00000 | 1434 | 0.0   | 0.00000 |
| 1006 | 7.7  | 0.00765 | 1441 | 7.7   | 0.00532 |
| 1018 | 0    | 0.00000 | 1448 | 0.0   | 0.00000 |
| 1044 | 0    | 0.00000 | 1451 | 0.0   | 0.00000 |
| 1045 | 0.3  | 0.00029 | 1453 | 2.5   | 0.00170 |
| 1053 | 1.9  | 0.00180 | 1454 | 1.6   | 0.00108 |
| 1054 | 0    | 0.00000 | 1466 | 0.0   | 0.00000 |
| 1059 | 0    | 0.00000 | 1477 | 4.0   | 0.00269 |
| 1061 | 2.3  | 0.00217 | 1494 | 0.0   | 0.00000 |
| 1066 | 0.7  | 0.00066 | 1495 | 0.0   | 0.00000 |

|      |      |         |      |       |         |
|------|------|---------|------|-------|---------|
| 1068 | 0    | 0.00000 | 1496 | 0.0   | 0.00000 |
| 1073 | 0    | 0.00000 | 1498 | 105.5 | 0.07041 |
| 1074 | 0    | 0.00000 | 1504 | 11.8  | 0.00782 |
| 1084 | 0    | 0.00000 | 1508 | 0.0   | 0.00000 |
| 1089 | 4.1  | 0.00376 | 1508 | 0.0   | 0.00000 |
| 1095 | 6    | 0.00548 | 1508 | 0.0   | 0.00000 |
| 1111 | 0    | 0.00000 | 1519 | 0.1   | 0.00008 |
| 1123 | 20.8 | 0.01852 | 1521 | 0.0   | 0.00000 |
| 1145 | 1.1  | 0.00096 | 1524 | 0.0   | 0.00000 |
| 1158 | 0    | 0.00000 | 1524 | 0.0   | 0.00000 |
| 1236 | 0    | 0.00000 | 1531 | 12.5  | 0.00815 |
| 1238 | 81.7 | 0.06599 | 1554 | 0.0   | 0.00000 |
| 1249 | 1.4  | 0.00112 | 1558 | 8.4   | 0.00541 |
| 1250 | 0    | 0.00000 | 1576 | 0.0   | 0.00000 |
| 1257 | 0    | 0.00000 | 1592 | 0.6   | 0.00037 |
| 1257 | 0    | 0.00000 | 2336 | 33.6  | 0.01436 |
| 1277 | 0    | 0.00000 | 3064 | 0.0   | 0.00000 |
| 1287 | 1.1  | 0.00085 | 3064 | 0.1   | 0.00002 |
| 1329 | 0    | 0.00000 | 3072 | 2.8   | 0.00092 |
| 1387 | 0    | 0.00000 | 3072 | 0.0   | 0.00000 |
| 1396 | 2.3  | 0.00165 | 3081 | 0.0   | 0.00000 |
| 1429 | 0    | 0.00000 | 3081 | 0.2   | 0.00006 |
| 1432 | 0.9  | 0.00063 | 3111 | 0.0   | 0.00000 |
| 1433 | 0    | 0.00000 | 3111 | 0.0   | 0.00000 |
| 1433 | 0.2  | 0.00014 | 3121 | 0.0   | 0.00000 |
| 1436 | 0    | 0.00000 | 3123 | 0.0   | 0.00000 |
| 1442 | 0.8  | 0.00055 | 3137 | 0.0   | 0.00000 |
| 1443 | 0    | 0.00000 | 3137 | 0.0   | 0.00000 |
| 1445 | 5.5  | 0.00381 | 3160 | 0.0   | 0.00000 |
| 1452 | 0.1  | 0.00007 | 3161 | 0.0   | 0.00000 |
| 1454 | 0    | 0.00000 | 3166 | 0.0   | 0.00000 |
| 1458 | 8.8  | 0.00604 | 3166 | 0.0   | 0.00000 |
| 1467 | 0    | 0.00000 | 3183 | 0.0   | 0.00000 |
| 1467 | 1.1  | 0.00075 | 3183 | 0.2   | 0.00008 |
| 1478 | 0    | 0.00000 |      |       |         |
| 1484 | 40.2 | 0.02709 |      |       |         |
| 1489 | 40.5 | 0.02720 |      |       |         |
| 1504 | 0    | 0.00000 |      |       |         |
| 1505 | 0.2  | 0.00013 |      |       |         |
| 1509 | 6.4  | 0.00424 |      |       |         |
| 1510 | 0    | 0.00000 |      |       |         |
| 1513 | 0    | 0.00000 |      |       |         |
| 1518 | 0.2  | 0.00013 |      |       |         |
| 1519 | 0    | 0.00000 |      |       |         |
| 1520 | 0.1  | 0.00007 |      |       |         |

|      |     |         |
|------|-----|---------|
| 1520 | 0   | 0.00000 |
| 1521 | 0   | 0.00000 |
| 1531 | 2.3 | 0.00150 |
| 1531 | 0   | 0.00000 |
| 1532 | 0   | 0.00000 |
| 1536 | 1.5 | 0.00098 |
| 1540 | 0   | 0.00000 |
| 1542 | 2.2 | 0.00143 |
| 1543 | 0   | 0.00000 |
| 1545 | 1.7 | 0.00110 |
| 1553 | 0   | 0.00000 |
| 1554 | 0.1 | 0.00006 |
| 1556 | 0   | 0.00000 |
| 1565 | 0.5 | 0.00032 |
| 1568 | 0   | 0.00000 |
| 1574 | 6.1 | 0.00388 |
| 3055 | 3.3 | 0.00108 |
| 3067 | 0.4 | 0.00013 |
| 3067 | 0   | 0.00000 |
| 3069 | 0   | 0.00000 |
| 3069 | 0.1 | 0.00003 |
| 3073 | 0   | 0.00000 |
| 3073 | 1.1 | 0.00036 |
| 3076 | 0   | 0.00000 |
| 3076 | 6.6 | 0.00215 |
| 3085 | 0   | 0.00000 |
| 3085 | 2.8 | 0.00091 |
| 3119 | 1   | 0.00032 |
| 3131 | 0   | 0.00000 |
| 3131 | 0   | 0.00000 |
| 3132 | 0   | 0.00000 |
| 3133 | 0   | 0.00000 |
| 3143 | 0   | 0.00000 |
| 3143 | 0   | 0.00000 |
| 3146 | 0   | 0.00000 |
| 3147 | 1   | 0.00032 |
| 3149 | 0   | 0.00000 |
| 3150 | 0   | 0.00000 |
| 3154 | 0   | 0.00000 |
| 3163 | 0   | 0.00000 |
| 3163 | 0   | 0.00000 |
| 3176 | 0.6 | 0.00019 |
| 3176 | 0   | 0.00000 |
| 3186 | 0   | 0.00000 |
| 3186 | 0   | 0.00000 |

|       |                        |                        |
|-------|------------------------|------------------------|
| 3193  | 0                      | 0.00000                |
| 3193  | 0                      | 0.00000                |
| 3212  | 0                      | 0.00000                |
| 3213  | 0.1                    | 0.00003                |
| <hr/> |                        |                        |
|       | $\sum \lambda_i = 616$ | $\sum \lambda_i = 512$ |

**Table S3.** Phases of the oscillations obtained by LPSVD analyses of the time-resolved fluorescence signals acquired by excitation of either  $S_2$  or direct  $S_1$  states. Fluorescence was detected at 650 nm for both dyes in the direct excitation of  $S_1$  state. For the  $S_2$  excitation, fluorescence was detected at 630 and 652 nm for PM597 and PM650, respectively.

| PM597                    |                |                | PM650                    |                |                |
|--------------------------|----------------|----------------|--------------------------|----------------|----------------|
| Freq (cm <sup>-1</sup> ) | Phase (deg.)   |                | Freq (cm <sup>-1</sup> ) | Phase (deg.)   |                |
|                          | S <sub>1</sub> | S <sub>2</sub> |                          | S <sub>1</sub> | S <sub>2</sub> |
| 93                       | 160            | 120            | 152                      | 240            | 200            |
| 139                      | 230            | 210            | 292                      | 140            | 130            |
|                          |                |                | 412                      | 170            | 220            |
|                          |                |                | 548                      | 230            | 200            |

**Table S4.** Geometry of the  $S_0$  state of PM597 calculated by DFT method using CAM-B3LYP/6-31+G(d,p).

| Number | Atomic Number | Coordinates (Å) |           |           |
|--------|---------------|-----------------|-----------|-----------|
|        |               | X               | Y         | Z         |
| 1      | 6             | -1.221496       | 0.827483  | 0.048589  |
| 2      | 6             | 1.221525        | 0.827448  | 0.048553  |
| 3      | 6             | 0.000021        | 1.518881  | -0.026428 |
| 4      | 6             | -2.577430       | 1.277758  | 0.072221  |
| 5      | 6             | -3.397144       | 0.142400  | 0.013235  |
| 6      | 6             | -2.516440       | -0.977866 | 0.029874  |
| 7      | 7             | 1.244308        | -0.559813 | 0.059544  |
| 8      | 7             | -1.244328       | -0.559772 | 0.059584  |
| 9      | 5             | -0.000025       | -1.475031 | 0.091279  |
| 10     | 6             | 2.577483        | 1.277661  | 0.072133  |
| 11     | 6             | 3.397140        | 0.142279  | 0.013160  |
| 12     | 6             | 2.516402        | -0.977962 | 0.029769  |
| 13     | 6             | 4.925736        | 0.026906  | -0.079547 |
| 14     | 6             | -4.925741       | 0.026954  | -0.079575 |
| 15     | 6             | 5.638304        | 1.361426  | -0.368442 |
| 16     | 1             | 5.662643        | 2.027392  | 0.496327  |
| 17     | 1             | 6.680479        | 1.152453  | -0.632112 |
| 18     | 1             | 5.186795        | 1.895472  | -1.209943 |
| 19     | 6             | 5.507738        | -0.524932 | 1.236427  |
| 20     | 1             | 5.117417        | -1.514369 | 1.486245  |
| 21     | 1             | 6.599022        | -0.605153 | 1.165615  |
| 22     | 1             | 5.271101        | 0.142931  | 2.071552  |
| 23     | 6             | 5.305975        | -0.896322 | -1.257827 |
| 24     | 1             | 4.911920        | -1.907326 | -1.162925 |
| 25     | 1             | 4.937829        | -0.481763 | -2.202612 |
| 26     | 1             | 6.396707        | -0.975778 | -1.327640 |
| 27     | 6             | -5.638511       | 1.361402  | -0.368295 |
| 28     | 1             | -6.680488       | 1.152239  | -0.632600 |
| 29     | 1             | -5.663518       | 2.027003  | 0.496728  |
| 30     | 1             | -5.186709       | 1.895915  | -1.209343 |
| 31     | 6             | -5.507753       | -0.525229 | 1.236248  |
| 32     | 1             | -6.599019       | -0.605605 | 1.165346  |
| 33     | 1             | -5.117290       | -1.514659 | 1.485887  |
| 34     | 1             | -5.271272       | 0.142500  | 2.071524  |
| 35     | 6             | -5.305818       | -0.896102 | -1.258037 |
| 36     | 1             | -4.937595       | -0.481376 | -2.202718 |
| 37     | 1             | -4.911726       | -1.907103 | -1.163254 |
| 38     | 1             | -6.396540       | -0.975595 | -1.327972 |
| 39     | 9             | -0.000019       | -2.229891 | 1.275132  |
| 40     | 9             | -0.000056       | -2.332162 | -1.012720 |
| 41     | 6             | -2.807858       | -2.447176 | 0.022488  |
| 42     | 1             | -2.786766       | -2.842206 | -0.999149 |
| 43     | 1             | -2.049854       | -2.984320 | 0.592743  |
| 44     | 1             | -3.781911       | -2.670085 | 0.454717  |
| 45     | 6             | 2.807746        | -2.447287 | 0.022314  |
| 46     | 1             | 2.049745        | -2.984414 | 0.592589  |
| 47     | 1             | 2.786575        | -2.842278 | -0.999337 |
| 48     | 1             | 3.781811        | -2.670268 | 0.454475  |
| 49     | 6             | 2.991858        | 2.708770  | 0.283966  |
| 50     | 1             | 3.175690        | 3.247247  | -0.653991 |



|    |   |           |          |           |
|----|---|-----------|----------|-----------|
| 51 | 1 | 2.231765  | 3.259000 | 0.837831  |
| 52 | 1 | 3.903359  | 2.767426 | 0.873803  |
| 53 | 6 | 0.000015  | 2.999523 | -0.314684 |
| 54 | 1 | 0.000059  | 3.603361 | 0.600245  |
| 55 | 1 | 0.876077  | 3.278167 | -0.896697 |
| 56 | 1 | -0.876107 | 3.278170 | -0.896606 |
| 57 | 6 | -2.991637 | 2.708914 | 0.284074  |
| 58 | 1 | -2.231353 | 3.259096 | 0.837731  |
| 59 | 1 | -3.175625 | 3.247364 | -0.653868 |
| 60 | 1 | -3.902980 | 2.767704 | 0.874126  |

**Table S5.** Geometry of the  $S_1$  state of PM597 calculated by TDDFT method using CAM-B3LYP/6-31+G(d,p).

| Number | Atomic Number | Coordinates (Å) |           |           |
|--------|---------------|-----------------|-----------|-----------|
|        |               | X               | Y         | Z         |
| 1      | 6             | -1.216148       | 0.816135  | -0.003970 |
| 2      | 6             | 1.216150        | 0.816130  | -0.003971 |
| 3      | 6             | 0.000003        | 1.529403  | -0.174324 |
| 4      | 6             | -2.564383       | 1.276086  | 0.104435  |
| 5      | 6             | -3.390507       | 0.142002  | 0.050567  |
| 6      | 6             | -2.516033       | -0.994087 | 0.022353  |
| 7      | 7             | 1.235815        | -0.581623 | 0.002575  |
| 8      | 7             | -1.235817       | -0.581619 | 0.002577  |
| 9      | 5             | -0.000003       | -1.498801 | -0.012325 |
| 10     | 6             | 2.564387        | 1.276078  | 0.104425  |
| 11     | 6             | 3.390507        | 0.141990  | 0.050567  |
| 12     | 6             | 2.516030        | -0.994097 | 0.022351  |
| 13     | 6             | 4.916287        | 0.047836  | 0.000521  |
| 14     | 6             | -4.916287       | 0.047841  | 0.000517  |
| 15     | 6             | 5.602834        | 1.407385  | -0.214726 |
| 16     | 1             | 5.519982        | 2.064946  | 0.652212  |
| 17     | 1             | 6.671138        | 1.240036  | -0.388638 |
| 18     | 1             | 5.203889        | 1.930536  | -1.088834 |
| 19     | 6             | 5.461141        | -0.540327 | 1.318349  |
| 20     | 1             | 5.076198        | -1.541737 | 1.524064  |
| 21     | 1             | 6.555087        | -0.604364 | 1.277578  |
| 22     | 1             | 5.190875        | 0.098165  | 2.165948  |
| 23     | 6             | 5.348934        | -0.829662 | -1.194905 |
| 24     | 1             | 4.966482        | -1.848987 | -1.147063 |
| 25     | 1             | 5.005675        | -0.388482 | -2.136784 |
| 26     | 1             | 6.442790        | -0.889866 | -1.230578 |
| 27     | 6             | -5.602850       | 1.407380  | -0.214743 |
| 28     | 1             | -6.671147       | 1.240013  | -0.388683 |
| 29     | 1             | -5.520032       | 2.064939  | 0.652198  |
| 30     | 1             | -5.203891       | 1.930540  | -1.088840 |
| 31     | 6             | -5.461141       | -0.540320 | 1.318346  |
| 32     | 1             | -6.555086       | -0.604368 | 1.277571  |
| 33     | 1             | -5.076187       | -1.541725 | 1.524068  |
| 34     | 1             | -5.190885       | 0.098180  | 2.165943  |
| 35     | 6             | -5.348923       | -0.829670 | -1.194902 |
| 36     | 1             | -5.005662       | -0.388496 | -2.136783 |
| 37     | 1             | -4.966463       | -1.848992 | -1.147050 |
| 38     | 1             | -6.442778       | -0.889883 | -1.230580 |

---

|    |   |           |           |           |
|----|---|-----------|-----------|-----------|
| 39 | 9 | -0.000003 | -2.315827 | 1.135143  |
| 40 | 9 | -0.000005 | -2.314915 | -1.150785 |
| 41 | 6 | -2.813689 | -2.456329 | 0.011644  |
| 42 | 1 | -2.722211 | -2.864475 | -1.003574 |
| 43 | 1 | -2.087910 | -2.989250 | 0.630189  |
| 44 | 1 | -3.813189 | -2.677192 | 0.380606  |
| 45 | 6 | 2.813679  | -2.456340 | 0.011645  |
| 46 | 1 | 2.087897  | -2.989256 | 0.630191  |
| 47 | 1 | 2.722199  | -2.864488 | -1.003572 |
| 48 | 1 | 3.813177  | -2.677208 | 0.380609  |
| 49 | 6 | 2.924306  | 2.708669  | 0.386269  |
| 50 | 1 | 3.307632  | 3.249422  | -0.487079 |
| 51 | 1 | 2.054743  | 3.254003  | 0.753770  |
| 52 | 1 | 3.683613  | 2.776142  | 1.167386  |
| 53 | 6 | 0.000007  | 2.941192  | -0.691745 |
| 54 | 1 | 0.000007  | 3.714168  | 0.087101  |
| 55 | 1 | 0.882254  | 3.112813  | -1.314602 |
| 56 | 1 | -0.882234 | 3.112817  | -1.314607 |
| 57 | 6 | -2.924292 | 2.708677  | 0.386297  |
| 58 | 1 | -2.054723 | 3.254003  | 0.753794  |
| 59 | 1 | -3.307624 | 3.249440  | -0.487042 |
| 60 | 1 | -3.683589 | 2.776148  | 1.167424  |

---

**Table S6.** Geometry of the  $S_0$  state of PM650 calculated by DFT method using CAM-B3LYP/6-31+G(d,p).

| Number | Atomic Number | Coordinates (Å) |           |           |
|--------|---------------|-----------------|-----------|-----------|
|        |               | X               | Y         | Z         |
| 1      | 6             | -1.225047       | 0.681922  | 0.000001  |
| 2      | 6             | 1.225047        | 0.681919  | 0.000002  |
| 3      | 6             | 0.000002        | 1.352524  | -0.000012 |
| 4      | 6             | -2.570977       | 1.151322  | -0.000004 |
| 5      | 6             | -3.381300       | 0.022709  | -0.000035 |
| 6      | 6             | -2.527072       | -1.108212 | -0.000007 |
| 7      | 7             | 1.246352        | -0.706481 | 0.000063  |
| 8      | 7             | -1.246355       | -0.706478 | 0.000029  |
| 9      | 5             | -0.000004       | -1.629559 | 0.000077  |
| 10     | 6             | 2.570978        | 1.151316  | -0.000007 |
| 11     | 6             | 3.381299        | 0.022702  | -0.000001 |
| 12     | 6             | 2.527067        | -1.108219 | 0.000027  |
| 13     | 9             | -0.000028       | -2.432797 | 1.143290  |
| 14     | 9             | 0.000019        | -2.432877 | -1.143073 |
| 15     | 6             | -2.892087       | -2.552769 | -0.000019 |
| 16     | 1             | -2.475852       | -3.054079 | -0.879141 |
| 17     | 1             | -2.475750       | -3.054120 | 0.879027  |
| 18     | 1             | -3.974683       | -2.684645 | 0.000040  |
| 19     | 6             | 2.892080        | -2.552776 | -0.000014 |
| 20     | 1             | 2.475458        | -3.054223 | 0.878840  |
| 21     | 1             | 2.476129        | -3.053988 | -0.879327 |
| 22     | 1             | 3.974675        | -2.684653 | 0.000370  |
| 23     | 6             | 3.049061        | 2.569038  | -0.000050 |
| 24     | 1             | 2.699006        | 3.120266  | -0.878447 |
| 25     | 1             | 2.699129        | 3.120280  | 0.878388  |
| 26     | 1             | 4.141010        | 2.598822  | -0.000131 |
| 27     | 6             | -3.049060       | 2.569045  | 0.000003  |
| 28     | 1             | -2.698997       | 3.120301  | 0.878378  |
| 29     | 1             | -2.699138       | 3.120258  | -0.878457 |
| 30     | 1             | -4.141009       | 2.598826  | 0.000094  |
| 31     | 6             | -4.880916       | 0.007567  | -0.000065 |
| 32     | 1             | -5.289878       | 0.511216  | 0.882937  |
| 33     | 1             | -5.289838       | 0.511856  | -0.882715 |
| 34     | 1             | -5.272772       | -1.011733 | -0.000449 |
| 35     | 6             | 4.880914        | 0.007556  | -0.000048 |
| 36     | 1             | 5.289832        | 0.511118  | -0.883120 |
| 37     | 1             | 5.289884        | 0.511929  | 0.882532  |
| 38     | 1             | 5.272767        | -1.011746 | 0.000412  |
| 39     | 6             | 0.000006        | 2.788139  | -0.000046 |
| 40     | 7             | 0.000025        | 3.944456  | -0.000080 |

**Table S7.** Geometry of the S<sub>1</sub> state of PM650 calculated by TDDFT method using CAM-B3LYP/6-31+G(d,p).

| Number | Atomic Number | Coordinates (Å) |           |           |
|--------|---------------|-----------------|-----------|-----------|
|        |               | X               | Y         | Z         |
| 1      | 6             | -1.228646       | 0.696586  | 0.000002  |
| 2      | 6             | 1.228645        | 0.696581  | 0.000002  |
| 3      | 6             | 0.000002        | 1.408303  | -0.000009 |
| 4      | 6             | -2.570743       | 1.153775  | 0.000003  |
| 5      | 6             | -3.373920       | 0.011600  | -0.000024 |
| 6      | 6             | -2.510915       | -1.123688 | -0.000017 |
| 7      | 7             | 1.234408        | -0.705943 | 0.000055  |
| 8      | 7             | -1.234412       | -0.705938 | 0.000003  |
| 9      | 5             | -0.000004       | -1.627529 | 0.000038  |
| 10     | 6             | 2.570743        | 1.153766  | -0.000016 |
| 11     | 6             | 3.373918        | 0.011590  | 0.000022  |
| 12     | 6             | 2.510909        | -1.123696 | 0.000054  |
| 13     | 9             | -0.000037       | -2.439344 | 1.141257  |
| 14     | 9             | 0.000025        | -2.439374 | -1.141152 |
| 15     | 6             | -2.863599       | -2.566476 | -0.000031 |
| 16     | 1             | -2.439509       | -3.068448 | -0.877658 |
| 17     | 1             | -2.439413       | -3.068487 | 0.877525  |
| 18     | 1             | -3.945015       | -2.708989 | 0.000024  |
| 19     | 6             | 2.863592        | -2.566484 | 0.000036  |
| 20     | 1             | 2.439157        | -3.068562 | 0.877431  |
| 21     | 1             | 2.439748        | -3.068388 | -0.877752 |
| 22     | 1             | 3.945007        | -2.708999 | 0.000373  |
| 23     | 6             | 3.052305        | 2.570476  | -0.000067 |
| 24     | 1             | 2.704131        | 3.124208  | -0.877960 |
| 25     | 1             | 2.704238        | 3.124239  | 0.877850  |
| 26     | 1             | 4.144762        | 2.597829  | -0.000138 |
| 27     | 6             | -3.052305       | 2.570484  | 0.000034  |
| 28     | 1             | -2.704097       | 3.124241  | 0.877897  |
| 29     | 1             | -2.704273       | 3.124223  | -0.877913 |
| 30     | 1             | -4.144762       | 2.597836  | 0.000146  |
| 31     | 6             | -4.867346       | -0.014981 | -0.000026 |
| 32     | 1             | -5.275795       | 0.493995  | 0.881465  |
| 33     | 1             | -5.275798       | 0.494597  | -0.881163 |
| 34     | 1             | -5.256719       | -1.034888 | -0.000373 |
| 35     | 6             | 4.867344        | -0.014995 | -0.000002 |
| 36     | 1             | 5.275776        | 0.493892  | -0.881553 |
| 37     | 1             | 5.275815        | 0.494670  | 0.881075  |
| 38     | 1             | 5.256714        | -1.034902 | 0.000437  |
| 39     | 6             | 0.000007        | 2.823812  | -0.000054 |
| 40     | 7             | 0.000033        | 3.985897  | -0.000097 |
